# Supplementary material
Source: PubMed Central journal article supplement (PMC7112716)
Supplement: NIHMS1549638-supplement-1.pdf [file NIHMS1549638-supplement-1.pdf]

## **Germinal center B cells selectively oxidize fatty acids for energy while conducting minimal glycolysis**

Florian J. Weisel<sup>1,9\*</sup>, Steven J. Mullett<sup>2</sup>, Rebecca A. Elsner<sup>1</sup>, Ashley V. Menk<sup>3</sup>, Nikita Trivedi<sup>1</sup>, Wei Luo<sup>1</sup>, Daniel Wikenheiser<sup>1</sup>, William F. Hawse<sup>1</sup>, Maria Chikina<sup>5</sup>, Shuchi Smita<sup>4,5</sup>, Laura J. Conter<sup>1</sup>, Stephen M. Joachim<sup>1</sup>, Stacy G. Wendell<sup>2,4</sup>, Michael J. Jurczak<sup>6,7</sup>, Thomas H. Winkler<sup>8</sup>, Greg M. Delgoffe<sup>1,3</sup>, Mark J. Shlomchik<sup>1,9\*</sup>

### **Affiliations**

<sup>1</sup> Department of Immunology, University of Pittsburgh, Pittsburgh, PA 15261, USA.; <sup>2</sup> Health Sciences Metabolomics and Lipidomics Core, University of Pittsburgh, Pittsburgh, PA 15261, USA.; <sup>3</sup> Tumor Microenvironment Center, University of Pittsburgh Cancer Institute, Pittsburgh, PA 15261, USA.; <sup>4</sup> Department of Pharmacology and Chemical Biology, University of Pittsburgh, Pittsburgh, PA 15261, USA.; <sup>5</sup> Department of Computational and Systems Biology, University of Pittsburgh School of Medicine, Pittsburgh, PA 15260, USA.; <sup>6</sup> Division of Endocrinology and Metabolism, Department of Medicine, University of Pittsburgh, Pittsburgh, PA.; <sup>7</sup> Center for Metabolism and Mitochondrial Medicine, University of Pittsburgh, Pittsburgh, PA.; <sup>8</sup> Division of Genetics, Department of Biology, Nikolaus-Fiebiger-Center for Molecular Medicine, Friedrich-Alexander-University Erlangen-Nuremberg, Erlangen, Germany; <sup>9</sup> senior authors; \* Correspondence to: [fweisel@pitt.edu](mailto:fweisel@pitt.edu); [mshlomch@pitt.edu](mailto:mshlomch@pitt.edu)

Supplementary table 1. Antibodies used in this study

| <b>Target antigen</b> | <b>conjugation</b> | <b>clone</b> | <b>Company</b> | <b>Catalog number</b> | <b>Lot number</b> | <b>Titer to use</b> |
|-----------------------|--------------------|--------------|----------------|-----------------------|-------------------|---------------------|
| anti-CD40             | biotin             | MR-1B        | homemade       | N/A                   | N/A               | 10 µg/ml            |
| anti-CD4              | biotin             | GK1.5        | homemade       | N/A                   | N/A               | 1:800               |
| anti-CD8              | biotin             | T1B105       | homemade       | N/A                   | N/A               | 1:400               |
| anti-CD11b            | biotin             | M1/70        | homemade       | N/A                   | N/A               | 1:1600              |
| anti-CD38             | biotin             | 90           | homemade       | N/A                   | N/A               | 1:500               |
| anti-CD43             | biotin             | S7           | homemade       | N/A                   | N/A               | 1:200               |
| anti-CD11c            | biotin             | N418         | homemade       | N/A                   | N/A               | 1:250               |
| anti-IgD              | biotin             | 11-26c       | eBioscience    | 13-5993-82            | 4283682           | 1:250               |
| anti-Ter119           | biotin             | Ter119       | homemade       | N/A                   | N/A               | 1:800               |
| anti-CD49b            | biotin             | Dx5          | BD Pharmingen  | 553856                | 7341684           | 1:300               |
| anti-Gr1              | biotin             | RB6-8C5      | Biologend      | 108404                | B236916           | 1:500               |
| anti-CD138            | biotin             | 281-2        | BD Biosciences | 553713                | 5195797           | 1:500               |
| anti-CD4              | BV605              | RM4-5        | BD Horizon     | 563151                | 8039838           | 1:200               |
| anti-CD19             | BV786              | 1D3          | BD Horizon     | 563333                | 8008977           | 1:800               |
| streptavidin          | BUV737             | N/A          | BD Horizon     | 564293                | 5149748           | 1:1000              |
| anti-CD95             | PE-Cy7             | Jo2          | BD Biosciences | 557653                | 8165575           | 1:300               |
| PMP70                 | unconjugated       | polyclonal   | Invitrogen     | PA1-650               | TJ272181          | 1:400               |
| goat anti-rabbit IgG  | Cy3                | polyclonal   | Invitrogen     | A10520                | 1891009           | 1:400               |
| anti-CD36             | APC                | 72-1         | eBioscience    | 17-0361-80            | E13418-109        | 1:1000              |
| anti-CD45.2           | APC-eFluor 780     | 104          | eBioscience    | 47-0454-82            | 1946667           | 1:200               |
| anti-CD45.1           | BV650              | A20          | Biologend      | 110736                | B243451           | 1:200               |
| anti-CD86             | Alexa Fluor 488    | GL-1         | homemade       | N/A                   | N/A               | 1:400               |
| anti-CD93             | PE                 | AA4.1        | Biologend      | 136504                | B213154           | 1:200               |
| anti-CD38             | pacific blue       | 90           | homemade       | N/A                   | N/A               | 1:400               |
| anti-CD4              | Alexa Fluor 700    | GK1.5        | homemade       | N/A                   | N/A               | 1:400               |
| anti-CD19             | BUV395             | 1D3          | BD Biosciences | 563557                | 9165724           | 1:200               |
| anti-CD38             | PE                 | 90           | Biologend      | 102708                | B159089           | 1:400               |

|                         |                 |         |                |        |         |       |
|-------------------------|-----------------|---------|----------------|--------|---------|-------|
| anti-CD86               | BV650           | GL-1    | Biolegend      | 105036 | B251588 | 1:400 |
| anti-CD44               | APC-Cy7         | IM7     | Biolegend      | 103028 | B262797 | 1:200 |
| anti-CD138              | APC             | 281-2   | Biolegend      | 142506 | B173073 | 1:200 |
| anti-CXCR4              | BV421           | L276F12 | Biolegend      | 146511 | B249866 | 1:400 |
| anti-CXCR5              | PE-Cy7          | 2GB     | BD Biosciences | 560617 | 6096593 | 1:200 |
| anti-TCR beta           | BV421           | H57-597 | Biolegend      | 109230 | B251262 | 1:200 |
| anti PD-1 (CD279)       | BV605           | J43     | BD Biosciences | 563059 | 7047607 | 1:50  |
| anti-CD4                | PE              | GK1.5   | Biolegend      | 100408 | B196678 | 1:800 |
| anti ICOS (CD278)       | Alexa Fluor 647 | C398.4A | Biolegend      | 313516 | B205067 | 1:200 |
| anti-CD19               | APC-Cy7         | 1D3     | BD Biosciences | 557655 | 8194765 | 1:200 |
| anti-TCR beta           | PerCP-Cy5.5     | H57-597 | Biolegend      | 109228 | B272829 | 1:100 |
| anti-lambda light chain | pacific blue    | JC5     | homemade       | N/A    | N/A     | 1:200 |
| anti-CD86               | PE              | GL1     | BD Biosciences | 553692 | 4073721 | 1:200 |
| anti-CD19               | Alexa Fluor 647 | 1D3     | homemade       | N/A    | N/A     | 1:800 |
| anti-CD4                | pacific blue    | GK1.5   | homemade       | N/A    | N/A     | 1:200 |
| anti-CD4                | Alexa Fluor 647 | GK1.5   | homemade       | N/A    | N/A     | 1:400 |
